# Supplementary material for: Influence of the Proton Pump Inhibitor Esomeprazole on the Bioavailability of Regorafenib: A Randomized Crossover Pharmacokinetic Study
Source: PubMed Central journal article supplement — Clin Pharmacol Ther. 2019 Feb 10;105(6):1456–61. doi: 10.1002/cpt.1331 (PMC6593619; doi:10.1002/cpt.1331), 2019-02-10

### Figure S1. M-2 and M-5 AUC

M-2 and M-5 exposure compared between phase A (regorafenib alone) and phase B (regorafenib concomitantly with esomeprazole) (figure 1A, 1C), and between phase A and C (regorafenib with esomeprazole 3 hours prior) (figure 1B, 1D)

Abbreviations:  $AUC_{0-24}$  = Area under the curve, timepoint 0h to 24h

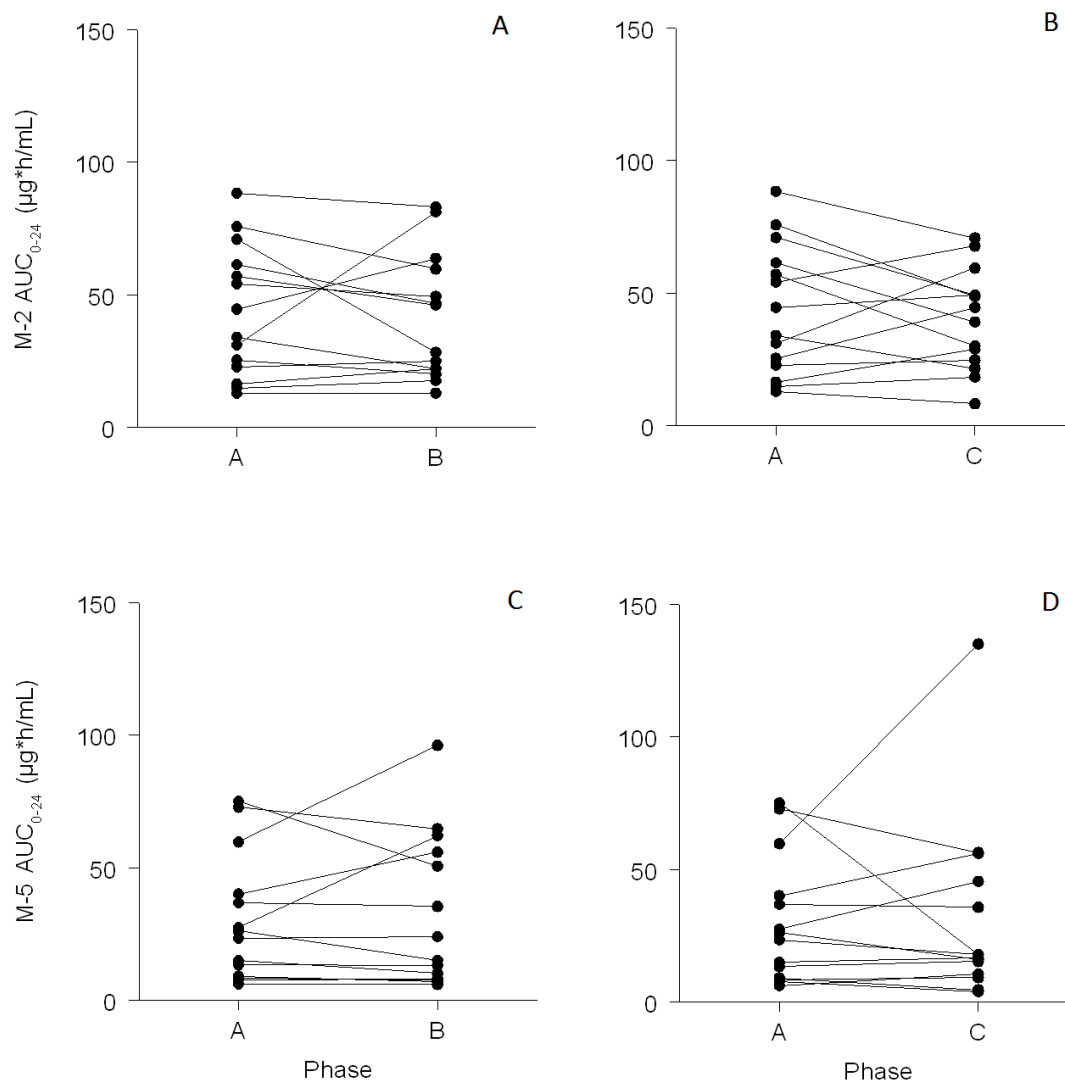

Supplement: CPT-105-1456-s001.pdf [file CPT-105-1456-s001.pdf]
