# Supplementary material for: Influence of the Proton Pump Inhibitor Esomeprazole on the Bioavailability of Regorafenib: A Randomized Crossover Pharmacokinetic Study
Source: PubMed Central journal article supplement — Clin Pharmacol Ther. 2019 Feb 10;105(6):1456–61. doi: 10.1002/cpt.1331 (PMC6593619; doi:10.1002/cpt.1331), 2019-02-10
Supplement: CPT-105-1456-s002.pdf [file CPT-105-1456-s002.pdf]

**Table S1. Toxicity**

| <b>Toxicity<sup>a</sup></b>                           | <b>Regorafenib<br/>N (%)</b> | <b>Regorafenib +<br/>Esomeprazole<br/>Concomitant<br/>N (%)</b> | <b>Regorafenib +<br/>Esomeprazole<br/>3h prior<br/>N (%)</b> | <b>Overall<sup>b</sup><br/>N (%)</b> |
|-------------------------------------------------------|------------------------------|-----------------------------------------------------------------|--------------------------------------------------------------|--------------------------------------|
| <b>Gastrointestinal</b>                               |                              |                                                                 |                                                              |                                      |
| Anorexia<br>All grades<br>Grade ≥3                    | 6 (43)<br>1 (7)              | 5 (36)<br>1 (7)                                                 | 5 (36)<br>1 (7)                                              | 10 (71)<br>2 (14)                    |
| Constipation<br>All grades<br>Grade ≥3                | 2 (14)<br>0                  | 2 (14)<br>0                                                     | 1 (7)<br>0                                                   | 4 (29)<br>0                          |
| Diarrhea<br>All grades<br>Grade ≥3                    | 0                            | 1 (7)<br>0                                                      | 2 (14)<br>0                                                  | 2 (14)<br>0                          |
| Nausea<br>All grades<br>Grade ≥3                      | 2 (14)<br>0                  | 5 (36)<br>0                                                     | 3 (21)<br>0                                                  | 7 (50)<br>0                          |
| Reflux<br>All grades<br>Grade ≥3                      | 1 (7)<br>0                   | 0<br>0                                                          | 1 (7)<br>0                                                   | 2 (14)<br>0                          |
| Stomatitis<br>All grades<br>Grade ≥3                  | 5 (36)<br>0                  | 6 (43)<br>0                                                     | 5 (36)<br>0                                                  | 8 (57)<br>0                          |
| Vomiting<br>All grades<br>Grade ≥3                    | 2 (14)<br>0                  | 2 (14)<br>0                                                     | 3 (21)<br>0                                                  | 5 (36)<br>0                          |
| <b>Respiratory</b>                                    |                              |                                                                 |                                                              |                                      |
| Cough<br>All grades<br>Grade ≥3                       | 0                            | 2 (14)<br>0                                                     | 1 (7)<br>0                                                   | 2 (14)<br>0                          |
| Dry mouth<br>All grades<br>Grade ≥3                   | 0                            | 1 (7)<br>0                                                      | 3 (21)<br>0                                                  | 3 (21)<br>0                          |
| Dyspnea<br>All grades<br>Grade ≥3                     | 3 (21)<br>0                  | 3 (21)<br>0                                                     | 4 (29)<br>1 (7)                                              | 6 (43)<br>1 (7)                      |
| Ear pain<br>All grades<br>Grade ≥3                    | 1 (7)<br>0                   | 2 (14)<br>0                                                     | 1 (7)<br>0                                                   | 3 (21)<br>0                          |
| Hoarseness<br>All grades<br>Grade ≥3                  | 8 (57)<br>0                  | 11 (79)<br>0                                                    | 9 (64)<br>0                                                  | 11 (79)<br>0                         |
| <b>Vascular</b>                                       |                              |                                                                 |                                                              |                                      |
| Cardiac events <sup>c</sup><br>All grades<br>Grade ≥3 | 0                            | 2 (14)<br>0                                                     | 0                                                            | 2 (14)<br>0                          |
| Hypertension<br>All grades<br>Grade ≥3                | 4 (29)<br>3 (21)             | 4 (29)<br>3 (21)                                                | 5 (36)<br>5 (36)                                             | 10 (71)<br>9 (64)                    |
| <b>Skin &amp; Hair</b>                                |                              |                                                                 |                                                              |                                      |
| Erythema<br>All grades<br>Grade ≥3                    | 1 (7)<br>0                   | 2 (14)<br>0                                                     | 1 (7)<br>0                                                   | 4 (29)<br>0                          |
| Hand foot skin reaction<br>All grades<br>Grade ≥3     | 6 (43)<br>0                  | 9 (64)<br>1 (7)                                                 | 7 (50)<br>1 (7)                                              | 9 (64)<br>2 (14)                     |

|                                                                  |                 |                 |                 |                  |
|------------------------------------------------------------------|-----------------|-----------------|-----------------|------------------|
| Hypertrichosis<br><i>All grades</i><br><i>Grade ≥3</i>           | 0               | 1 (7)<br>0      | 1 (7)<br>0      | 1 (7)<br>0       |
| <b>General disorders</b>                                         |                 |                 |                 |                  |
| Fatigue<br><i>All grades</i><br><i>Grade ≥3</i>                  | 6 (43)<br>1 (7) | 7 (50)<br>0     | 7 (50)<br>1 (7) | 10 (71)<br>1 (7) |
| <b>Blood value disorders</b>                                     |                 |                 |                 |                  |
| AST/ALT increase<br><i>All grades</i><br><i>Grade ≥3</i>         | 7 (50)<br>0     | 6 (43)<br>1 (7) | 5 (36)<br>0     | 11 (79)<br>1 (7) |
| Bilirubin increase<br><i>All grades</i><br><i>Grade ≥3</i>       | 4 (29)<br>0     | 3 (21)<br>0     | 2 (14)<br>0     | 7 (50)<br>0      |
| Hypophosphatemia<br><i>All grades</i><br><i>Grade ≥3</i>         | 2 (14)<br>0     | 1 (7)<br>0      | 1 (7)<br>1 (7)  | 4 (29)<br>1 (7)  |
| Platelet count decreased<br><i>All grades</i><br><i>Grade ≥3</i> | 0               | 1 (7)<br>0      | 0               | 1 (7)<br>0       |

Number of patients is scored as individual patients per phase.

<sup>a</sup> Toxicity was graded according to the NCI CTC-AE classification (version 4.03)

<sup>b</sup> Overall toxicity was defined as the number of patients during the whole study period (i.e. all three phases)

<sup>c</sup> Cardiac events included atrial fibrillation and myocardial infarction

Abbreviations: AST = aspartate aminotransferase; ALT = alanine aminotransferase; N = number of patients
