# Supplementary material for: Influence of the Proton Pump Inhibitor Esomeprazole on the Bioavailability of Regorafenib: A Randomized Crossover Pharmacokinetic Study
Source: PubMed Central journal article supplement — Clin Pharmacol Ther. 2019 Feb 10;105(6):1456–61. doi: 10.1002/cpt.1331 (PMC6593619; doi:10.1002/cpt.1331), 2019-02-10
Supplement: CPT-105-1456-s003.pdf [file CPT-105-1456-s003.pdf]

## **Methods S1**

### *Detailed description assay regorafenib, M-2 and M-5*

Regorafenib and the metabolites M-2- and M-5 were simultaneously quantitated by a validated liquid chromatography tandem triple quadrupole mass spectrometry (UPLC-MS/MS) assay. Aliquots of 25  $\mu\text{L}$  of human lithium heparinized plasma samples for the quantitation of regorafenib and its metabolites were deproteinized, after the addition of 100  $\mu\text{L}$  of Internal Standard (sunitinib-d10). After vigorously mixing for 5 seconds and centrifugation for 10 min at 18,000\**g*, aliquots of 1  $\mu\text{L}$  were injected into the UPLC-MS/MS-system. Peak area ratios of analytes versus the Internal Standard were a function of the concentration from 20.0 to 5,000 ng/mL. For regorafenib, the within and between-run precisions at five tested concentrations, including the LLQ, were  $\leq 5.94$  and  $\leq 9.99\%$ , respectively, while the average accuracy ranged from 101.4 to 112.5%. For regorafenib-M2, the within and between-run precisions at five tested concentrations, including the LLQ, were  $\leq 5.18$  and  $\leq 11.4\%$ , respectively, while the average accuracy ranged from 91.0 to 96.7% and for regorafenib-M5, the within and between-run precisions at five tested concentrations, including the LLQ, were  $\leq 6.47$  and  $\leq 11.2\%$ , respectively, while the average accuracy ranged from 92.8 to 99.4%.
